# Supplementary material for: An electrochemical aptasensor based on a TiO2/three-dimensional reduced graphene oxide/PPy nanocomposite for the sensitive detection of lysozyme
Source: Royal Society of Chemistry journal article supplement (doi:10.1039/c5dt00168d), 2015-01-01
Supplement: c5dt00168d1.pdf [file c5dt00168d1.pdf]

## Supporting Information

### **An electrochemical aptasensor based on TiO<sub>2</sub>/three-dimensional reduced graphene oxide/PPy nanocomposite for the sensitive detection of lysozyme**

Minghua Wang<sup>a,b</sup>, Shuyong Zhai<sup>b</sup>, Zihan Ye<sup>b</sup>, Linghao He<sup>b</sup>, Donglai Peng<sup>b</sup>,  
Xiaozhong Feng<sup>b</sup>, Yanqin Yang<sup>a,b</sup>, Shaoming Fang<sup>a,b</sup>, Hongzhong Zhang<sup>\*a,b</sup>, Zhihong  
Zhang<sup>\*a,b</sup>

*<sup>a</sup>Collaborative Innovation Center of Environmental Pollution Control and Ecological Restoration,*

*<sup>b</sup>State Laboratory of Surface and Interface Science of Henan Province,  
Zhengzhou University of Light Industry, No. 166, Science Avenue, Zhengzhou 450001,  
P. R. China.*

*Corresponding author*

*Tel.: +86-37186609676*

*Fax: +86-37186609676*

*\*E-mail addresses: mainzh@163.com or zhz@zzuli.edu.cn*

## **1. Preparation of 3D-GO**

Graphene oxide (GO) was prepared by a modified Hummers method [1]. Crude GO was dispersed in 200 mL of deionized water and exfoliated with Cell Crusher (900–1000 W, 40 min) for 2 h. Finally, the product 3D-GO was obtained after freeze drying.

## **2. Preparation of TiO<sub>2</sub> hollow balls**

In a typical experiment [2], 12 g of glucose was dissolved in 80 mL of water to form a solution. The solution was then sealed in a 100 mL Teflon-lined autoclave maintained at 180 °C for 4 h. Products were centrifuged (5000 r/min), washed, and dispersed in water for five cycles, after which they were centrifuged, washed, and redispersed in ethanol for five cycles. The obtained carbon spheres were then dried at 80 °C for 2 h in a vacuum.

The starting solution was prepared by mixing 1 mL of Ti(OBu)<sub>4</sub> and 20 mL of ethanol. After stirring at 40 °C for 30 min, 0.1 g of colloidal carbon spheres [as prepared in Section (1)] was added to the reaction medium, which was then vigorously stirred for 1 h. When the mixture had cooled to room temperature, it was centrifuged, washed, and dispersed in ethanol for five cycles. The mixture was aged in air at room temperature for 12 h and dried at 60 °C in a vacuum oven. To fabricate TiO<sub>2</sub> hollow spheres, the mixture was heated at a rate of 2 K/min at room temperature and kept at 550 °C for 4 h in a muffle furnace.

## **3. Chemical structure of GO and TiO<sub>2</sub> nanoballs**

Fig. S1 shows the FTIR spectra of GO, water –OH stretching ( $3400\text{ cm}^{-1}$ ), carboxylates or ketones C=O stretching ( $1728\text{ cm}^{-1}$ ), water –OH bending and C=C stretching ( $1624\text{ cm}^{-1}$ ), alcoholic C–OH bending ( $1401\text{ cm}^{-1}$ ), epoxide C–O–C or phenolic C–O–H stretching ( $1222\text{ cm}^{-1}$ ), and C-O stretching ( $1043\text{ cm}^{-1}$ ). The wide peaks at  $400\text{--}600\text{ cm}^{-1}$  is attributed to the stretching vibration of Ti–O–Ti bonds in crystalline  $\text{TiO}_2$ .

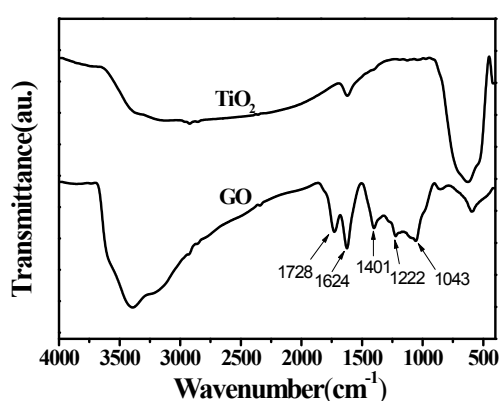

Fig. S1 FTIR spectra of GO and  $\text{TiO}_2$

#### 4. Surface morphology of GO and $\text{TiO}_2$ hollow balls

Fig. S2a shows the SEM images of 3D-rGO, which has a typically curved, layerlike structure tens of nanometers in size. The interpenetrating structure could increase the surface active area and loading capacity compared with graphene. This structure also favors molecular diffusion throughout the entire GR monolith. Thus, 3D-rGO was used as the platform matrix for the deposition of  $\text{TiO}_2$  particles to fabricate nanocomposites. SEM images show that pristine  $\text{TiO}_2$  has evident particle aggregation (Fig. S2b). Figs. 2c and 2d show the TEM images of GO and  $\text{TiO}_2$ .

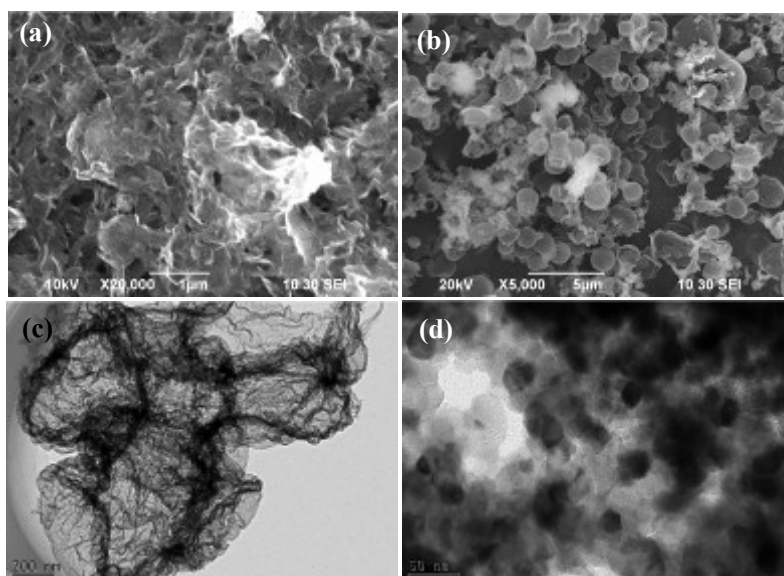

**Fig. S2** SEM images of (a) GO and (b) TiO<sub>2</sub>. TEM images of (c) GO and (d) TiO<sub>2</sub>.

### 5. CV measurements of samples at different stages and lysozyme detection

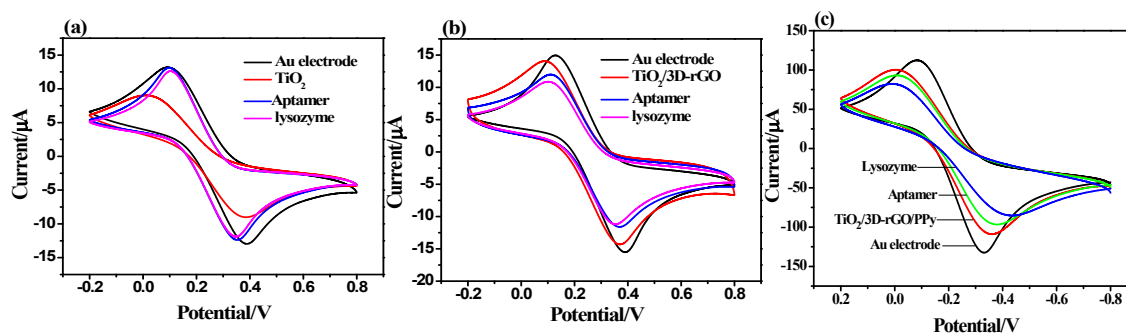

**Fig. S3** CV Curves of bare Au electrode vs. (a) TiO<sub>2</sub>, (b) TiO<sub>2</sub>/3D-rGO, and (c) TiO<sub>2</sub>/3D-rGO/PPy nanocomposite-modified Au electrode, immobilized aptamer, and aptamer coordinated with lysozyme (0.5 ng mL<sup>-1</sup>).

### 6. Kinetic behavior of the lysozyme adsorption onto the developed aptasensor

The result showed that the DNA G-quadruplexes could be removed from the TiO<sub>2</sub>/rGO/PPy matrix at the very beginning. After 2 h, the adsorption curve reached to equilibrium. Comparing with the current response of the TiO<sub>2</sub>/rGO/PPy electrode

immobilized with aptamer, the reserved  $\Delta I$  of 8.6 mA was observed, indicating that quite much DNA G-quadruplexes could be remained even after 10 h.

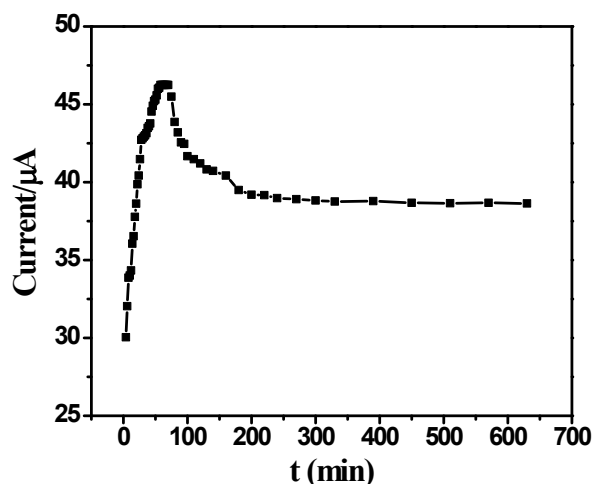

**Fig. S4** The dependence of the current response of the lysozyme detection using the developed aptasensor on the incubation time.

### 7. Thermogravimetric analysis (TGA) of $\text{TiO}_2/3\text{D-rGO}/\text{PPy}$ nanocomposite

The thermogravimetric analysis (TGA) was performed in  $\text{N}_2$  flow using a thermogravimetric analyzer (Diamond TG/DTA). The samples were heated from 20 °C to 800 °C at a rate of 10 °C  $\text{min}^{-1}$ . TGA curves of  $\text{TiO}_2$ , 3D-rGO,  $\text{TiO}_2/3\text{D-rGO}$  and  $\text{TiO}_2/3\text{D-rGO}/\text{PPy}$  nanocomposite were summarized in **Fig. S5**. The products have a little mass loss up to 150 °C due to the deintercalation of  $\text{H}_2\text{O}$ . [3] The decomposition of PPy is probably between 150 °C and 450 °C. [4] The mass loss for  $\text{TiO}_2$ , 3D-rGO,  $\text{TiO}_2/3\text{D-rGO}$  and  $\text{TiO}_2/3\text{D-rGO}/\text{PPy}$  are 5, 23.5, 20, and 47 wt.%, respectively. Based on the above TG analyses, the amount of  $\text{TiO}_2$ , 3D-rGO, PPy, and adsorbed water in the  $\text{TiO}_2/3\text{D-rGO}/\text{PPy}$  nanocomposite were approximately calculated to be about 7, 59, 25 and 9 wt.%, respectively.

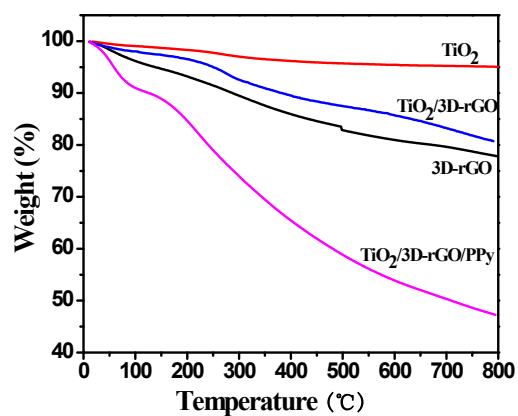

**Fig. S5** TGA curves of TiO<sub>2</sub>, 3D-rGO, TiO<sub>2</sub>/3D-rGO, and TiO<sub>2</sub>/3D-rGO/PPy nanocomposite.

## References

- [1] N.I. Kovtyukhova, P.J. Ollivier, B.R. Martin, T.E. Mallouk, S.A. Chizhik, E.V. Buzaneva, and A.D. Gorchinskiy, *Chem. Mater.* 1999, **11**, 771.
- [2] X. Sun, and Y. Li, *Angew. Chem. Int. Ed.* 2004, **43**, 597.
- [3] H. Zhang, G.R. Li, L.P. An, T.Y. Yan, X.P. Gao, H.Y. Zhu, *J. Phys. Chem. C* 2007, **111**, 6143.
- [4] M. Omastová, M. Trchová, J. Kovářová, J. Stejskal, *Synth. Met.* 2003, **138**, 447.
